# Supplementary material for: Analysis of Changes in Land Use/Land Cover and Hydrological Processes Caused by Earthquakes in the Atsuma River Basin in Japan
Source: MDPI journal article supplement (doi:10.3390/su132313041), 2021-11-25
Supplement: s1 [file s1]

The Information of dataset

| Data                                    | Resolution                     | Source and download path                                                                                                                                                                                                | Sensor platform | Acquisition date | Data number                                                     | Imaging date             | Spectral                                                                                                                                                                                                                                                                                                                                                                                                                                                                                                                                 | Location                       |
|-----------------------------------------|--------------------------------|-------------------------------------------------------------------------------------------------------------------------------------------------------------------------------------------------------------------------|-----------------|------------------|-----------------------------------------------------------------|--------------------------|------------------------------------------------------------------------------------------------------------------------------------------------------------------------------------------------------------------------------------------------------------------------------------------------------------------------------------------------------------------------------------------------------------------------------------------------------------------------------------------------------------------------------------------|--------------------------------|
| Digital elevation model (DEM)           | 0.4" × 0.4" (about 10m square) | Geographical information Authority of Japan<br><a href="https://fgd.gsi.go.jp/download/mapGis.php?tab=dem">https://fgd.gsi.go.jp/download/mapGis.php?tab=dem</a>                                                        | Aerial survey   | 2019.11          | 6342                                                            | 2018.07.26               |                                                                                                                                                                                                                                                                                                                                                                                                                                                                                                                                          |                                |
| Land use and land cover classifications | 30m (OLI)<br>100m (TIRS)       | United States Geological Survey<br><a href="https://earthexplorer.usgs.gov/">https://earthexplorer.usgs.gov/</a>                                                                                                        | Landset 8       | 2021.3           | LC08_L2SP_107030_20200531_20200820_107030_202150923_20200908_02 | 2015.09.23<br>2020.08.20 | Operational Land Imager (OLI):<br>Band 1 Visible (0.43 - 0.45 μm) 30 m<br>Band 2 Visible (0.450 - 0.51 μm) 30 m<br>Band 3 Visible (0.53 - 0.59 μm) 30 m<br>Band 4 Red (0.64 - 0.67 μm) 30 m<br>Band 5 Near-Infrared (0.85 - 0.88 μm) 30 m<br>Band 6 SWIR 1 (1.57 - 1.65 μm) 30 m<br>Band 7 SWIR 2 (2.11 - 2.29 μm) 30 m<br>Band 8 Panchromatic (PAN) (0.50 - 0.68 μm) 15 m<br>Band 9 Cirrus (1.36 - 1.38 μm) 30 m<br>Thermal Infrared Sensor (TIRS):<br>Band 10 TIRS 1 (10.6 - 11.19 μm) 100 m<br>Band 11 TIRS 2 (11.5 - 12.51 μm) 100 m | 705 kilometers above sea level |
| Soil types                              | 1/200,000                      | Ministry of Land, Infrastructure, Transport and Tourism of Japan<br><a href="https://nlftp.mlit.go.jp/kokjo/inspect/landclassification/land/l_n">https://nlftp.mlit.go.jp/kokjo/inspect/landclassification/land/l_n</a> |                 | 2019.11          | Hokkaido_1200,000 Land Classification Basic Survey              | 1978                     |                                                                                                                                                                                                                                                                                                                                                                                                                                                                                                                                          |                                |

|                                 |       |                                                                                                                                                      |        |                       |                                  |
|---------------------------------|-------|------------------------------------------------------------------------------------------------------------------------------------------------------|--------|-----------------------|----------------------------------|
| Radar precipitation data        | Daily | ational_map_20-1.html<br>Japan Meteorological Business Support Center<br><a href="http://www.jmbasc.or.jp/jp/">http://www.jmbasc.or.jp/jp/</a>       |        |                       | One station per square kilometer |
| Minimum and maximum temperature | Daily | Japan Meteorological Agency<br><a href="https://www.data.jma.go.jp/gmd/risk/obsdl/index.php">https://www.data.jma.go.jp/gmd/risk/obsdl/index.php</a> | 2021.5 | 2009.01.01-2020.12.31 | 42°43.8' N<br>141°53.3' E        |
| Wind speed                      |       |                                                                                                                                                      |        |                       |                                  |
| Relative humidity               | Daily |                                                                                                                                                      |        |                       | 42°37.4' N<br>141°32.8' E        |
| Solar radiation                 | Daily |                                                                                                                                                      |        |                       | 43°41' N<br>141°20' E            |

---
